# Supplementary material for: Multifunctional conjugated molecules combined with electrospun CuCoP/carbon nanofibers as a modifier of the Pt counter electrode for dye-sensitized solar cells
Source: Royal Society of Chemistry journal article supplement (doi:10.1039/d2tc01564a), 2022-01-01
Supplement: d2tc01564a1.pdf [file d2tc01564a1.pdf]

Supplementary Information

**Multifunctional conjugated molecules combined with electrospun  
CuCoP/carbon nanofibers as a modifier of Pt counter electrode for dye-  
sensitized solar cells**

Fang-Sian Lin,<sup>a‡</sup> Mani Sakthivel,<sup>b‡</sup> Miao-Syuan Fan,<sup>b</sup> Chien-Hsin Wu,<sup>a</sup> Guan-Lun Fong,<sup>b</sup> Jiang-Jen  
Lin,<sup>c,\*</sup> Ru-Jong Jeng,<sup>a,d,\*</sup> and Kuo-Chuan Ho<sup>a,b,d,\*</sup>

<sup>a</sup> Institute of Polymer Science and Engineering, National Taiwan University, Taipei 10617, Taiwan

<sup>b</sup> Department of Chemical Engineering, National Taiwan University, Taipei 10617, Taiwan

<sup>c</sup> Department of Materials Science and Engineering, National Chung Hsing University, Taichung,  
40227, Taiwan

<sup>d</sup> Advanced Research Center for Green Materials Science and Technology, National Taiwan  
University, Taipei 10617, Taiwan

‡ F. S. Lin and M. Sakthivel contributed equally to this work.

\*Corresponding authors:

E-mail: jianglin@ntu.edu.tw; Fax: +886-4-2285-7017; Tel: +886-4-2285-6293

E-mail: rujong@ntu.edu.tw; Fax: +886-2-3366-5237; Tel: +886-2-3366-5884

E-mail: kcho@ntu.edu.tw; Fax: +886-2-2362-3040; Tel: +886-2-2366-0739

## Materials

### The part of DPPTPTA/CuCoP/CNF

3-(4-Bromophenyl)propionic acid ( $\text{BrC}_6\text{H}_4\text{CH}_2\text{CH}_2\text{CO}_2\text{H}$ , 98%), anhydrous diethyl ether ( $\geq 99\%$ ), lithium aluminum hydride (LAH, 95%), hydrochloric acid (HCl, 37%), bis(pinacolato)diboron ( $\text{C}_{12}\text{H}_{24}\text{B}_2\text{O}_4$ , 99%), sodium acetate ( $\text{CH}_3\text{COONa}$ ,  $\geq 99\%$ ), anhydrous 1,4-dioxane (99.8%),  $\text{PdCl}_2(\text{PPh}_3)_2$  ( $[(\text{C}_6\text{H}_5)_3\text{P}]_2\text{PdCl}_2$ , 98%), 1,3,5-tribromobenzene ( $\text{C}_6\text{H}_3\text{Br}_3$ , 98%), anhydrous toluene (99.8%), anhydrous ethanol ( $\geq 99.5\%$ ),  $\text{Pd}(\text{PPh}_3)_4$  ( $\text{Pd}[(\text{C}_6\text{H}_5)_3\text{P}]_4$ , 99.99%), potassium carbonate ( $\text{K}_2\text{CO}_3$ , 99%), 3,6-bis(5-bromothien-2-yl)-2,5-bis(2-ethylhexyl)pyrrolo[3,4-c]pyrrole-1,4(2H,5H)-dione ( $\text{C}_{46}\text{H}_{70}\text{Br}_2\text{N}_2\text{O}_2\text{S}_2$ , 98%), tetrakis(triphenylphosphine)palladium(0) ( $\text{Pd}(\text{P}(\text{C}_6\text{H}_5)_3)_4$ , 99.99%), anhydrous tetrahydrofuran (THF, 99.9%), 2-azido-1,3-dimethylimidazolium hexafluorophosphate ( $\text{C}_5\text{H}_{10}\text{F}_6\text{N}_5\text{P}$ , 97%), 1,8-diazabicyclo[5.4.0]undec-7-ene ( $\text{C}_9\text{H}_{16}\text{N}_2$ , 98%), polyacrylonitrile (PAN,  $M_w=150,000$ ), dimethylformamide (DMF, 99%), copper(II) chloride dihydrate ( $\text{CuCl}_2 \cdot 2\text{H}_2\text{O}$ ,  $\geq 99.0\%$ ), cobalt(II) chloride hexahydrate ( $\text{CoCl}_2 \cdot 6\text{H}_2\text{O}$ , 98%) and red phosphorous ( $\geq 99.99\%$ ) were received from Merck Industrial and Lab Chemicals.

### The part of photoanode preparation

Lithium perchlorate ( $\text{LiClO}_4$ ,  $\geq 98.0\%$ ), titanium(IV) tetraisopropoxide (TTIP,  $>98\%$ ), 2-methoxyethanol (99.95%) were obtained from Sigma-Aldrich. Lithium iodide (LiI, synthetic grade), poly(ethylene glycol) (PEG,  $M_w=20,000$ ) and iodine ( $\text{I}_2$ , synthetic grade) were received from Merck Industrial and Lab Chemicals. 4-tert-butylpyridine (*t*BP, 96%) and tert-butyl alcohol (*t*BA, 96%) were procured from Acros. 3-Methoxypropionitrile (MPN, 99%) and acetonitrile (ACN, 99.99%) were bought from Fluka. 1,2-Dimethyl-3-propylimidazolium iodide (DMPII), Surlyn<sup>®</sup> (SX1170-25, 25  $\mu\text{m}$ ) film, transparent  $\text{TiO}_2$  paste (TL paste, Ti-nanoxide T/SP, with an average particle size = 13 nm), and cis-diisothiocyanato-bis(2,2'-bipyridyl-4,4'-dicarboxylato) ruthenium (II) bis(tetrabutylammonium) (N719 dye) were received from Solaronix (S.A., Aubonne, Switzerland). Fluorine-doped tin oxide (FTO) conducting glasses ( $7 \Omega \text{ sq}^{-1}$ , UR-ITO007-0.7 mm) were obtained from NSG America, Inc., New

Jersey, USA. The commercial light scattering TiO<sub>2</sub> particles (ST-41; average particle size = 200 nm) were acquired from Ishihara Sangyo, Ltd.

### Cell Assembly

The TiO<sub>2</sub> (100 nm) paste (TTIP in 2-methoxyethanol (weight ratio = 1/3)) was coated on cleaned FTO glasses as the thin compact layers including transparent layer (10 μm) and scattering layer (4 μm) with an active area of 0.196 cm<sup>2</sup> by using the doctor blade technique. Herein, the commercial transparent paste (Ti-nanoxide T/SP) was used to prepare the transparent layer, while a home-made scattering paste was further used to prepare the scattering layer. Each layer was separately sintered at 500 °C for 30 min in ambient environment. After the sintering process, the TiO<sub>2</sub> film was immersed in N719 dye solution (5×10<sup>-4</sup> M of N719 in *t*BA and ACN (volume ratio = 1/1) solvent) for 24 h at room temperature. Finally, the dye-adsorbed TiO<sub>2</sub> photoanode was coupled to PtCE (the Pt layer thickness is around 197.36 μm and area = 3.125 cm<sup>2</sup>) with a modified layer coating, and a cell gap of 25 μm thick Surlyn<sup>®</sup> film as the spacer. The iodide/triiodide electrolyte (I<sup>-</sup>/I<sub>3</sub><sup>-</sup>) was prepared by mixing of 0.1 M LiI, 0.05 M I<sub>2</sub>, 0.6 M DMPII and 0.5 M *t*BP in ACN/MPN (volume ratio = 8/2). The iodide/triiodide electrolyte electrolyte was injected into the cell gap between the two electrodes by capillarity to form a device (i.e., photoanode/electrolyte/modified layer/PtCE).

The following three-step process was carried out to prepare the above-mentioned scattering paste: (1) The TiO<sub>2</sub> colloid was synthesized by mixing of 0.5 M TTIP solution with 0.1 M nitric acid aqueous solution and the mixed solution was further stirred at 88 °C for 8 h. (2) The solution was then transferred into an autoclave (PARR 4540, USA) and maintained at 240 °C for 12 h. The TiO<sub>2</sub> nanoparticles could reach an average diameter of 20 nm at this stage. (3) The scattering layer paste was acquired by the addition of 25 wt% PEG and 100 wt% of commercial scattering TiO<sub>2</sub> particles (ST-41) (both with respect to the weight of TiO<sub>2</sub>). In this case, PEG was used for not only preventing the aggregation of TiO<sub>2</sub> nanoparticles, but controlling the pore sizes on the TiO<sub>2</sub> nanoparticles as well.

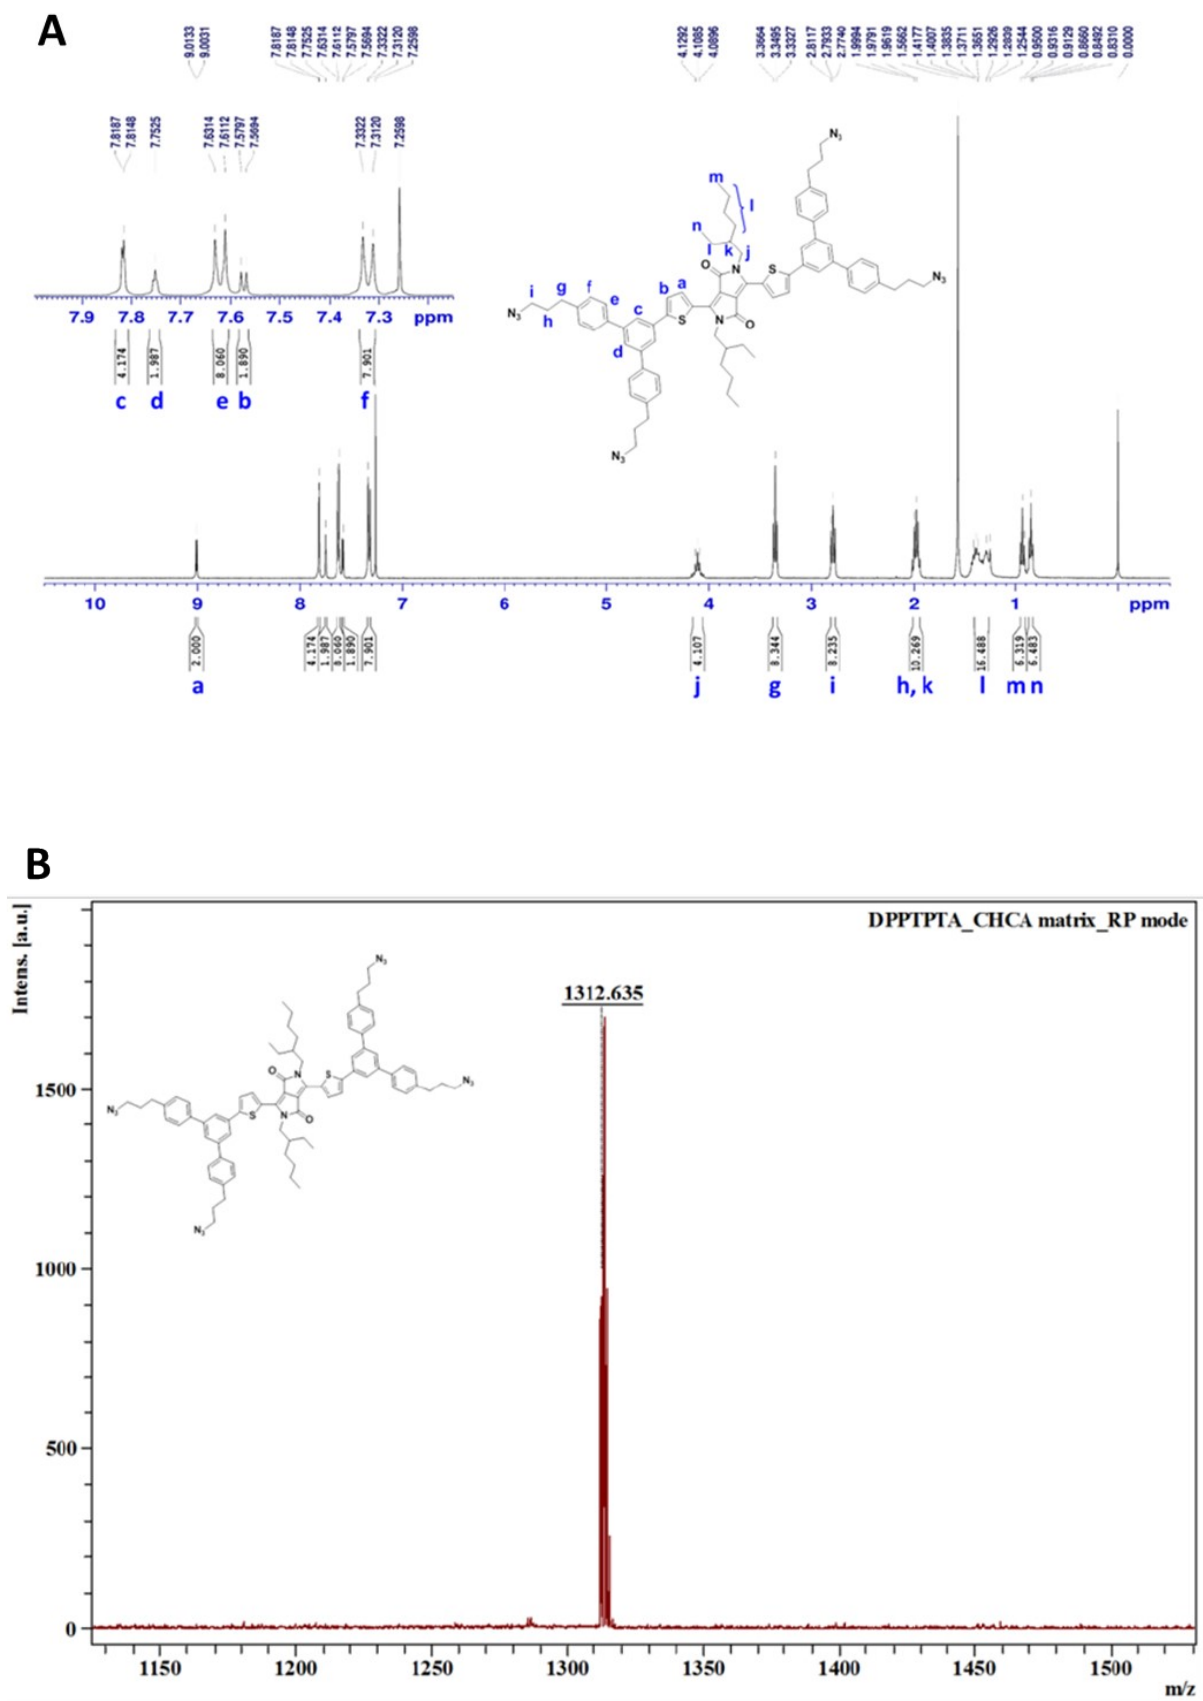

**Fig. S1** (A) FT-NMR spectrum of DPPTPTA, and (B) MALDI-TOF mass spectrum results.

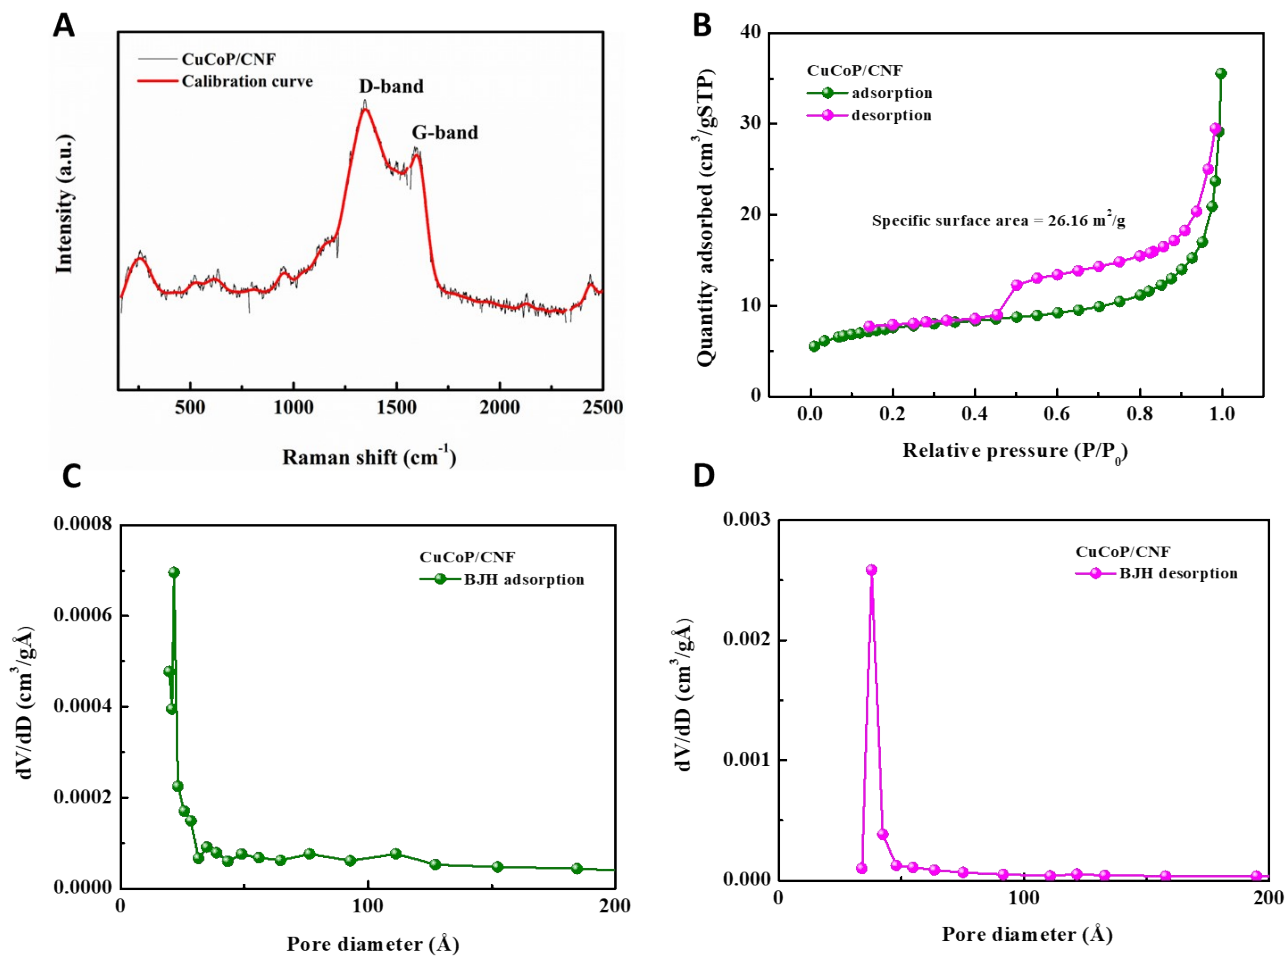

**Fig. S2** (A) In-situ Raman spectroscopy, (B) nitrogen adsorption/desorption isotherm, (C) BJH adsorption curve and (D) BJH desorption curve of CuCoP/CNF.

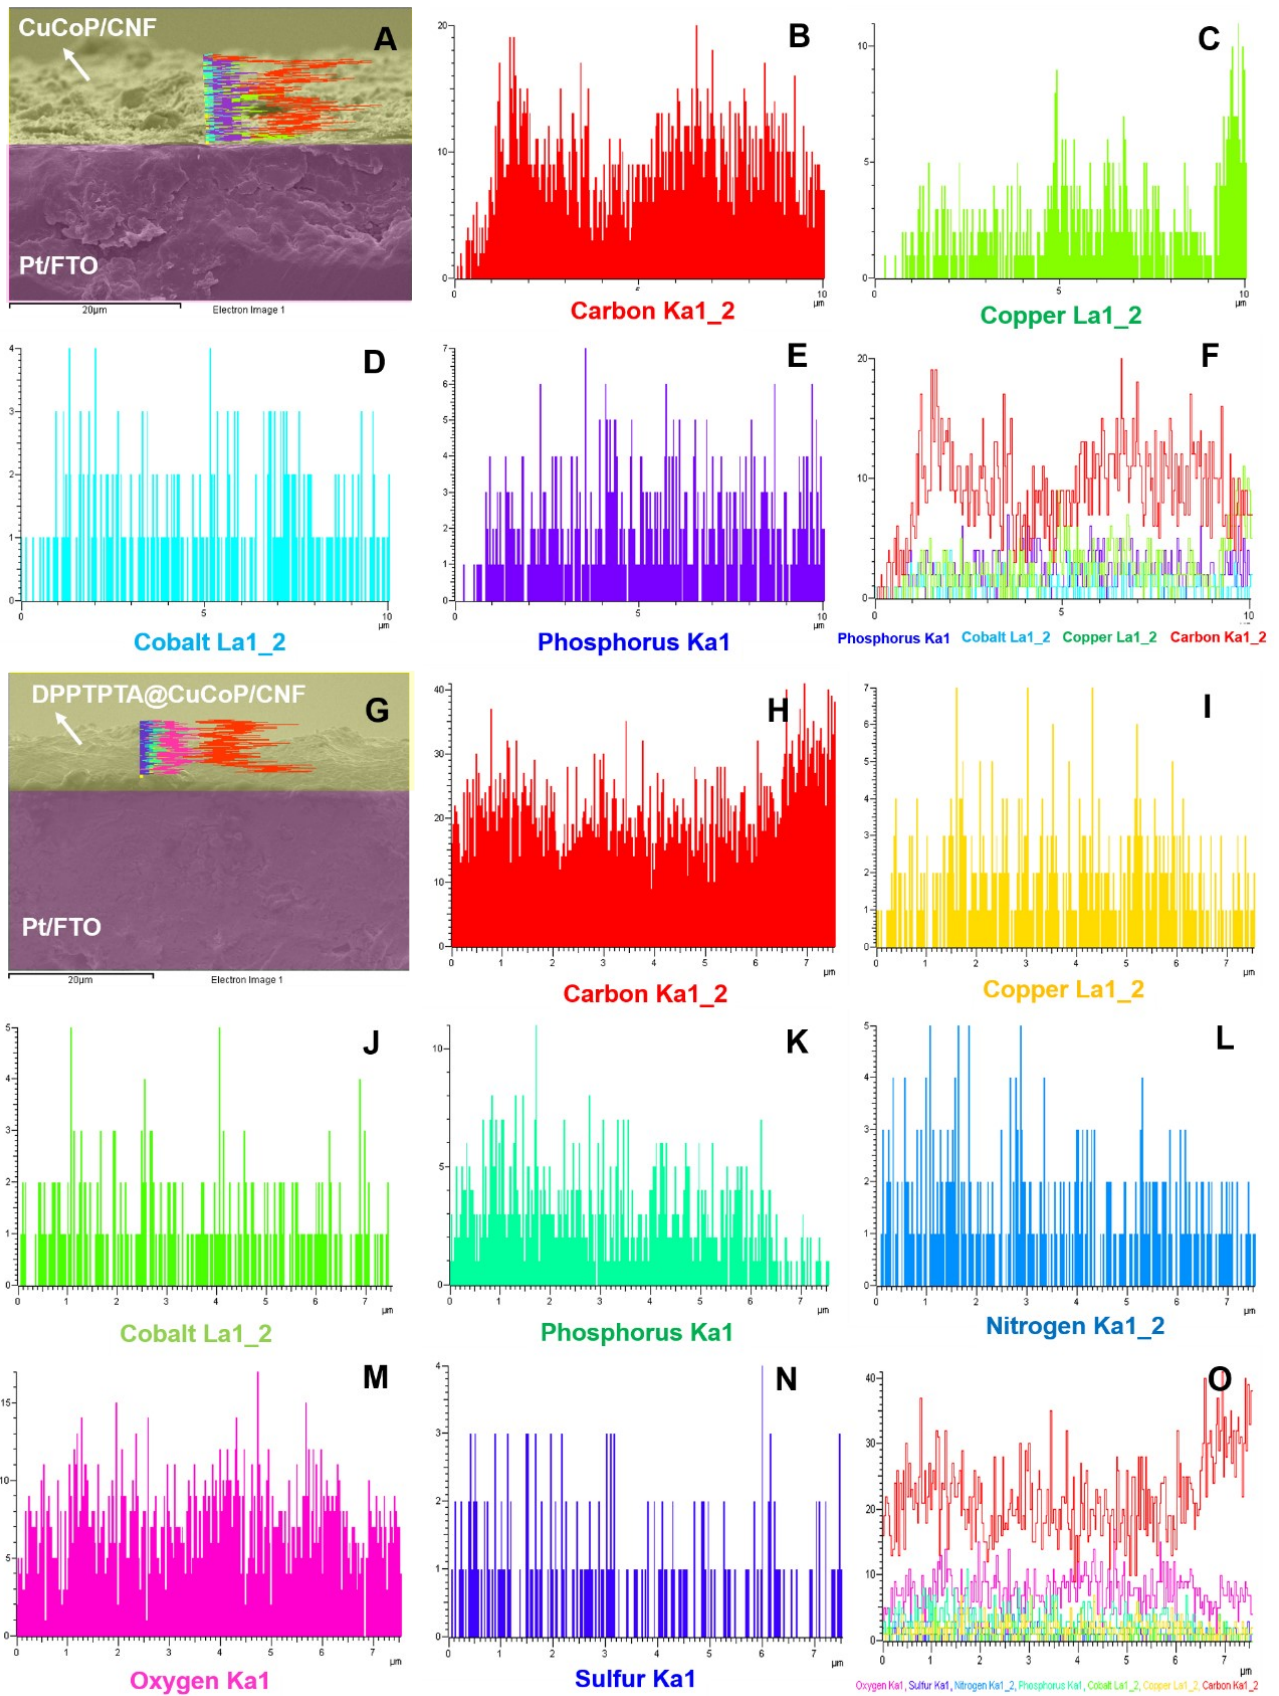

**Fig. S3** Elemental line mapping profile of (A-F) for CuCoP/CNF and (G-O) for DPPTPTA@CuCoP/CNF.

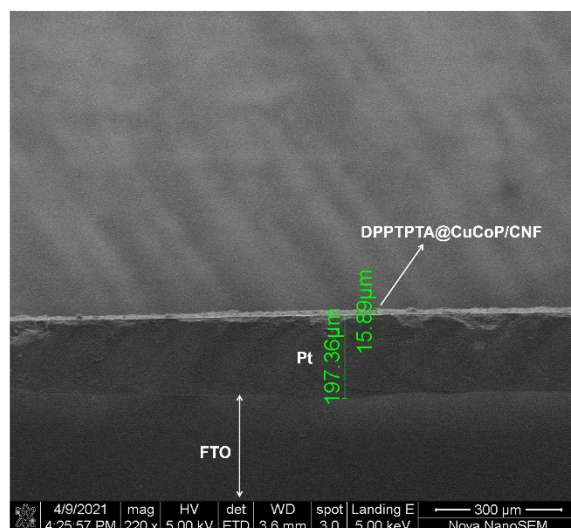

**Fig. S4** Cross-sectional FE-SEM image of DPPTPTA@CuCoP/CNF modified PtCE.

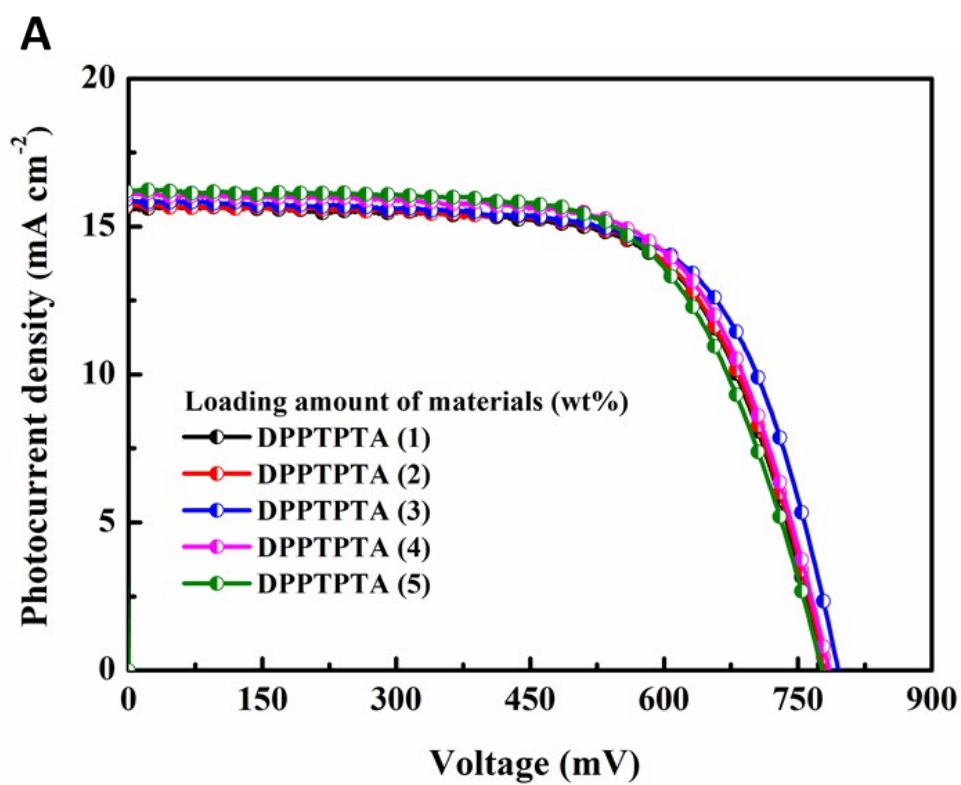

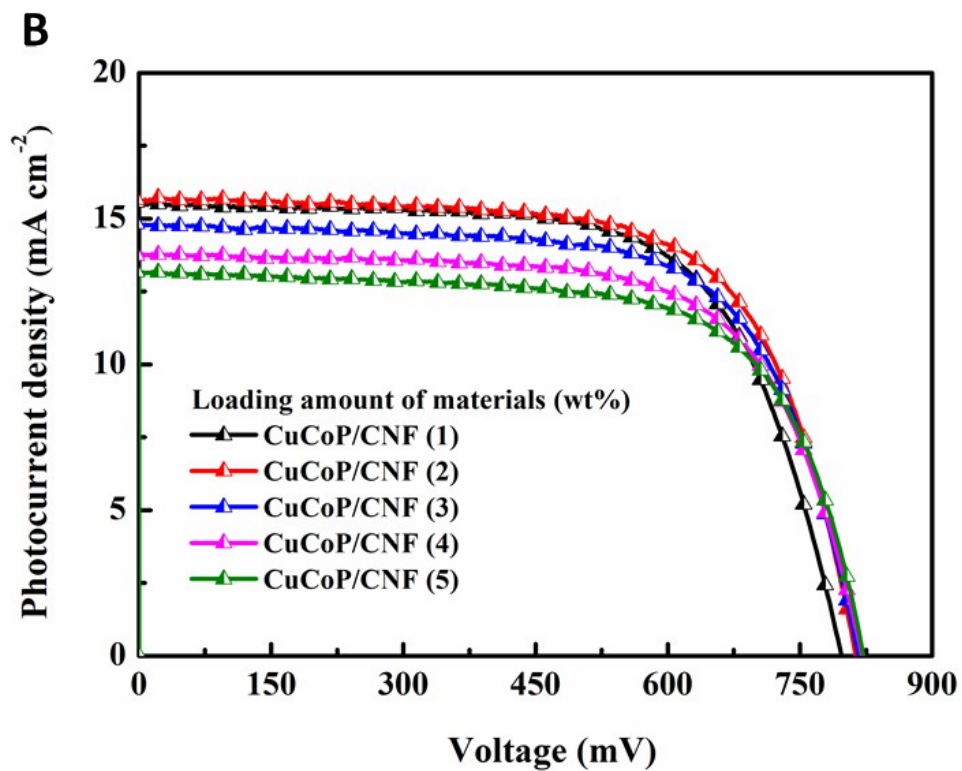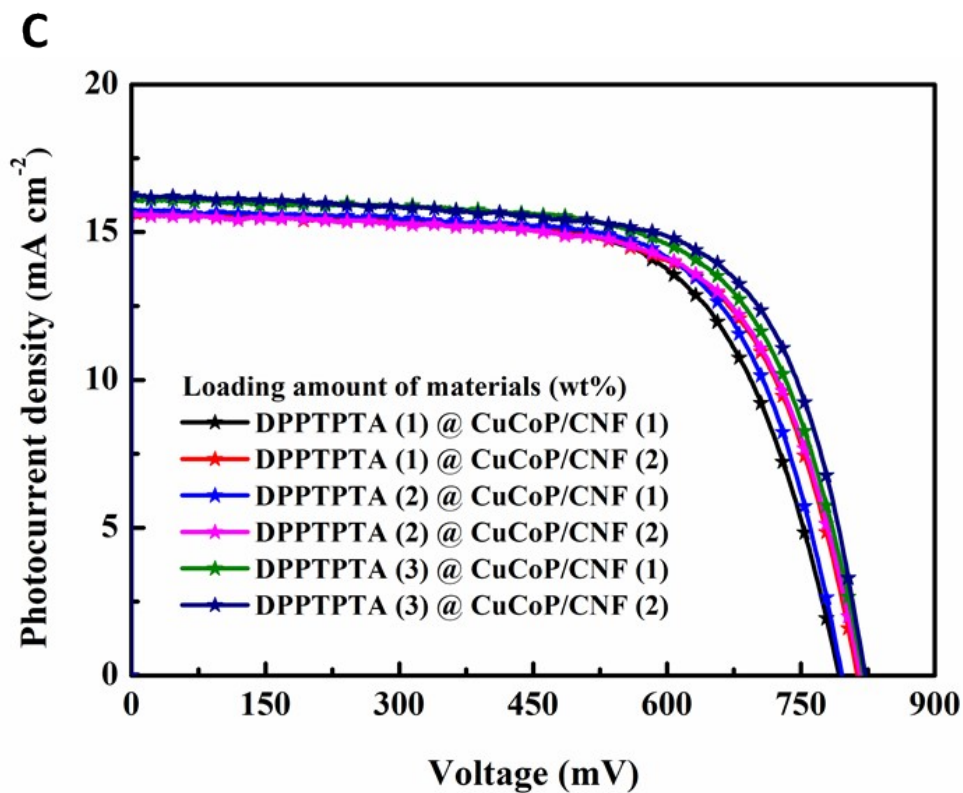

**Fig. S5** The photocurrent density-voltage curves of DSSCs with different loading amounts of (A) bare DPPTPTA, (B) bare CuCoP/CNF, and (C) DPPTPTA@CuCoP/CNF.



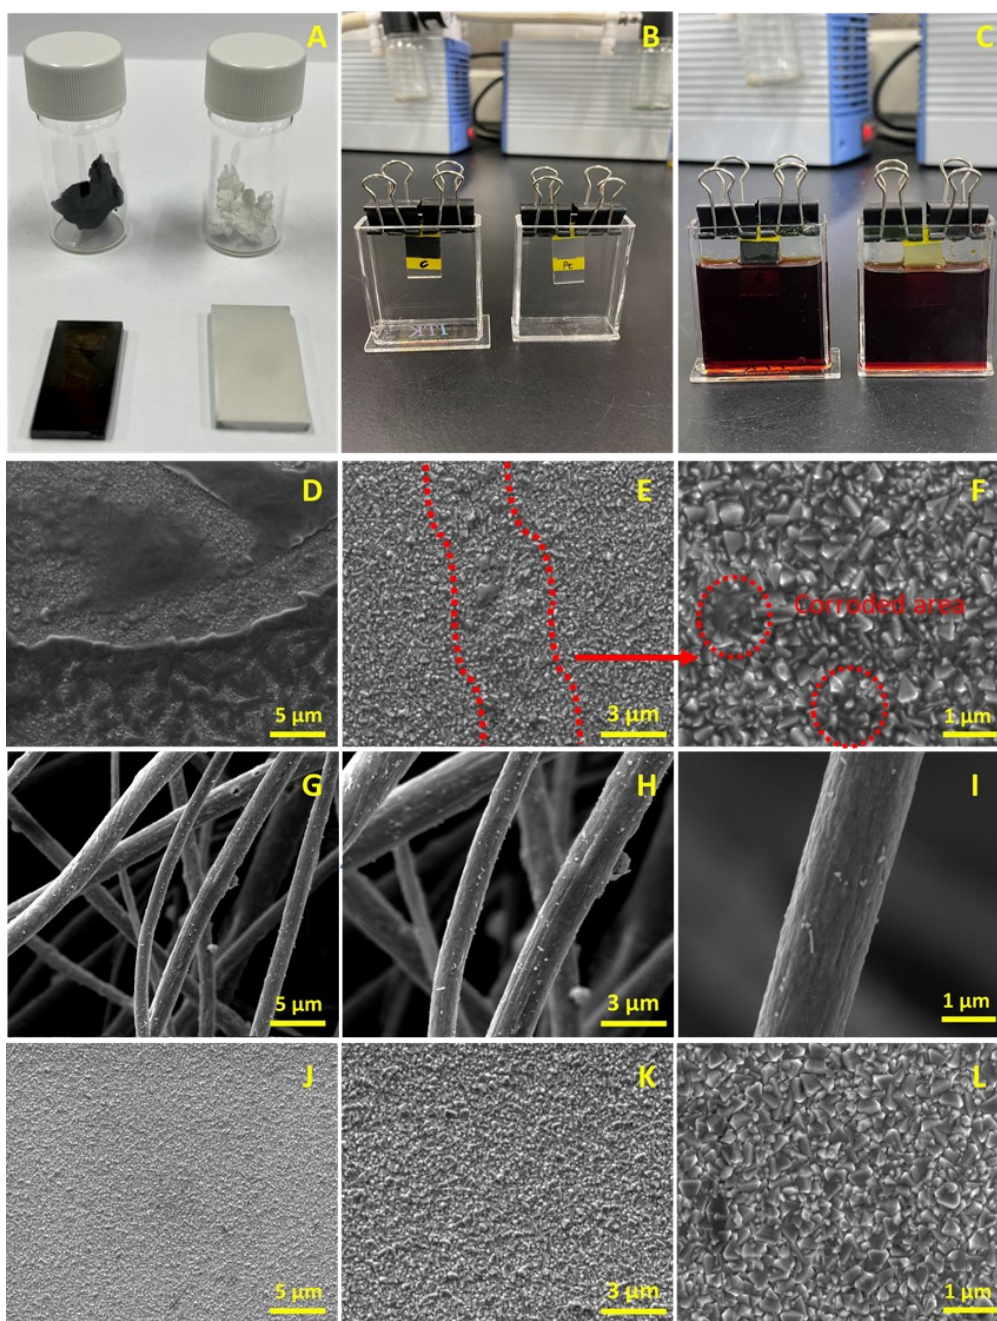

**Fig. S6** (A) Visual photograph of white as-spun membrane (before carbonization at 900°C) and bare CuCoP/CNF (black). (B) Visual photograph of the electrode with **DPPTPTA@CuCoP/CNF** modified layer and bare PtCE before soaking in iodide electrolyte for 168 h, and (C) after soaking in iodide electrolyte for 168 h. (D-F) FE-SEM images of bare PtCE after soaking in iodide electrolyte for 168 h. (G-I) FE-SEM images of the electrode with **DPPTPTA@CuCoP/CNF** modified layer after soaking in iodide electrolyte for 168 h. (J-L) FE-SEM images of PtCE after removing the **DPPTPTA@CuCoP/CNF** modified layer after soaking in iodide electrolyte for 168 h.

**Table S1** The photovoltaic performance of DSSCs with DPPTPTA and CuCoP/CNF alone as the modified layers under 1 sun conditions. <sup>a</sup>

| Modified layers (wt%) | $\eta$ (%)  | $V_{oc}$ (mV) | $J_{sc}$ (mA cm <sup>-2</sup> ) | $FF$        |
|-----------------------|-------------|---------------|---------------------------------|-------------|
| DPPTPTA (1)           | 8.28 ± 0.03 | 779 ± 2       | 15.63 ± 0.02                    | 0.68 ± 0.01 |
| CuCoP/CNF (1)         | 8.24 ± 0.03 | 796 ± 1       | 15.50 ± 0.03                    | 0.67 ± 0.00 |
| DPPTPTA (2)           | 8.31 ± 0.05 | 781 ± 1       | 15.70 ± 0.05                    | 0.68 ± 0.01 |
| CuCoP/CNF (2)         | 8.59 ± 0.02 | 813 ± 2       | 15.61 ± 0.04                    | 0.68 ± 0.00 |
| DPPTPTA (3)           | 8.53 ± 0.03 | 793 ± 2       | 15.86 ± 0.02                    | 0.68 ± 0.02 |
| CuCoP/CNF (3)         | 8.14 ± 0.02 | 815 ± 1       | 14.78 ± 0.02                    | 0.68 ± 0.00 |
| DPPTPTA (4)           | 8.49 ± 0.02 | 784 ± 2       | 16.08 ± 0.06                    | 0.67 ± 0.01 |
| CuCoP/CNF (4)         | 7.62 ± 0.01 | 820 ± 2       | 13.76 ± 0.05                    | 0.68 ± 0.00 |
| DPPTPTA (5)           | 8.25 ± 0.06 | 776 ± 1       | 16.20 ± 0.02                    | 0.66 ± 0.02 |
| CuCoP/CNF (5)         | 7.47 ± 0.02 | 827 ± 2       | 13.20 ± 0.03                    | 0.68 ± 0.00 |

<sup>a</sup> The standard deviation data for each DSSC are obtained based on three cells.

**Table S2** The photovoltaic performance of DSSCs with DPPTPTA@CuCoP/CNF of different loading amounts as the modified layers under 1 sun conditions. <sup>a</sup>

| Modified layers (wt%)       | $\eta$ (%)  | $V_{oc}$ (mV) | $J_{sc}$ (mA cm <sup>-2</sup> ) | $FF$        |
|-----------------------------|-------------|---------------|---------------------------------|-------------|
| DPPTPTA (1) @ CuCoP/CNF (1) | 8.26 ± 0.02 | 791 ± 1       | 15.66 ± 0.02                    | 0.67 ± 0.01 |
| DPPTPTA (1) @ CuCoP/CNF (2) | 8.55 ± 0.02 | 813 ± 2       | 15.53 ± 0.05                    | 0.68 ± 0.00 |
| DPPTPTA (2) @ CuCoP/CNF (1) | 8.54 ± 0.01 | 796 ± 2       | 15.75 ± 0.03                    | 0.68 ± 0.00 |
| DPPTPTA (2) @ CuCoP/CNF (2) | 8.58 ± 0.03 | 815 ± 1       | 15.58 ± 0.02                    | 0.68 ± 0.01 |
| DPPTPTA (3) @ CuCoP/CNF (1) | 8.91 ± 0.04 | 820 ± 1       | 16.08 ± 0.04                    | 0.68 ± 0.00 |
| DPPTPTA (3) @ CuCoP/CNF (2) | 9.50 ± 0.02 | 827 ± 2       | 16.25 ± 0.02                    | 0.71 ± 0.00 |

<sup>a</sup> The standard deviation data for each DSSC are obtained based on three cells.
